# Supplementary material
Source: bioRxiv or medRxiv preprint supplement (https://medrxiv.org/highwire/filestream/82045/field_highwire_adjunct_files/1/2020.05.18.20099960-2.pdf)
Supplement: Supplementary file [file 2020.05.18.20099960-2.pdf]

## Diagnosis

### High throughput, multi-system

Primary platform: Roche cobas® 6800. 1000 tests / instrument / day. 2 instruments in operation.

Additional platforms: ePlex, Diasorin Simplexa, Cepheid, BioFire and laboratory-developed RT-PCR test

### Viral loads

Laboratory-based RT-PCR platform. 100 tests / day.

### Phylogenetics

Research-only. Next-generation sequencing.

## Treatment guidance

### Cytokine Panel

ELLA platform.  
IL-6, IL-8, IL-1b, TNFa.

### Convalescent plasma

Evaluation of antibody levels in recovered patients  
ELISA platform.  
Collaboration with New York Blood Center.

## Autopsy service

### Rapid Autopsy Program

Family Liaison. Coordination of rapid autopsy cases  
Increased awareness hospital-wide of autopsy service capabilities

### COVID Autopsy Tissue Allocation Committee

Oversight of autopsy tissue  
Coordination with other institutional tissue banks  
Coordination with intramural and extramural researchers

### Directed post-mortem examination

Gross examination  
Microbiologic samples (CSF, BAL, tissues for viral load)  
Extended diagnostic FFPE block series (> 20 blocks for lungs)  
Collection of tissue in gluteraldehyde for Electron Microscopy  
Collection of fresh-frozen tissue  
Collection of tissue in OCT-blocks  
Collection of fresh tissue for single-cell disaggregation (BSL3)

### Neuropathology

Brain extraction in a powered, air-purifying respirator (PAPR)

### Molecular and Digital Pathology

RNAscope for SARS-CoV-2, ACE2 and TMPRSS2  
SARS-CoV-2 IHC panel  
ACE2, TMPRSS2 IHC panel  
Digitalization of all slides
